# Supplementary material
Source: Elsevier journal article supplement (https://rcastoragev2.blob.core.windows.net/aaf113d96065f00982851ce07397f38b/mmc1.pdf)
Supplement: mmc1 [file mmc1.pdf]

## **SUPPLEMENTARY FIGURE LEGENDS**

**Supplementary Figure 1. Trial-to-trial variability in response patterns in different visual areas.** The upper panels show the RDMs re-ordered based on the presentation order of the 140 stimuli and averaged across 25 runs and three subjects (for more details, see Fig. 9). The lower panels show the cross-sections of the drift patterns averaged across all stimuli for the three subjects (subjects shown in different colours). To the left are the averaged response-dissimilarities for trials before and to the right are the average response-dissimilarities for the trials after.

**Supplementary Figure 2. Effect of the trial structure on the RDMs.** The cross-sections shown in Supplementary Figure 1 are shown here separately for the different trial positions. The trial structure followed a pattern where every 8<sup>th</sup> trial was a rest trial. The first row shows the average dissimilarity of the response patterns compared to the first trial in the consecutive presentation of the seven trials, and correspondingly the second row shows the results for the second trial, the third row for the third trial, the fourth row for the middle trial, and so on.

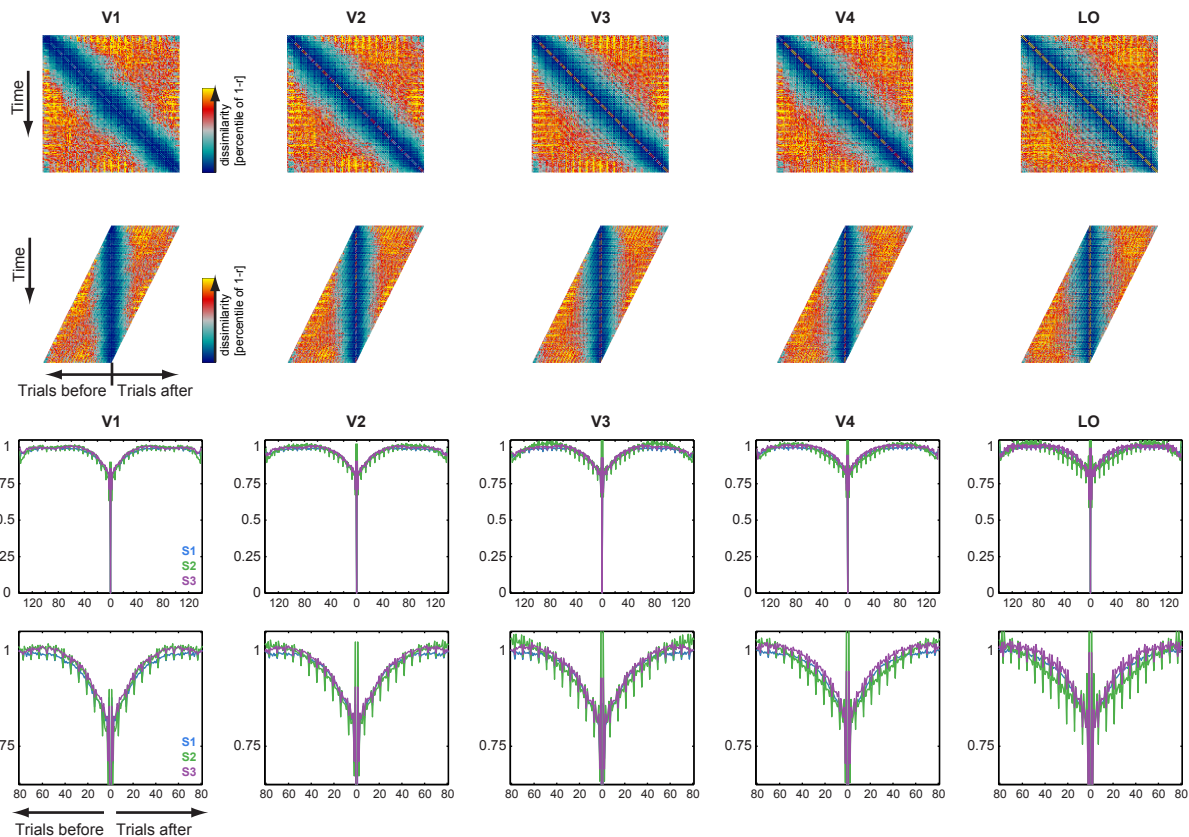

Supplementary Figure1  
Henriksson et al.

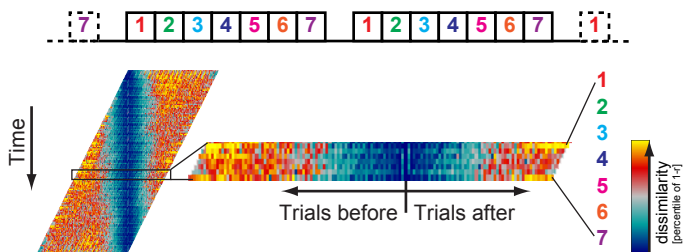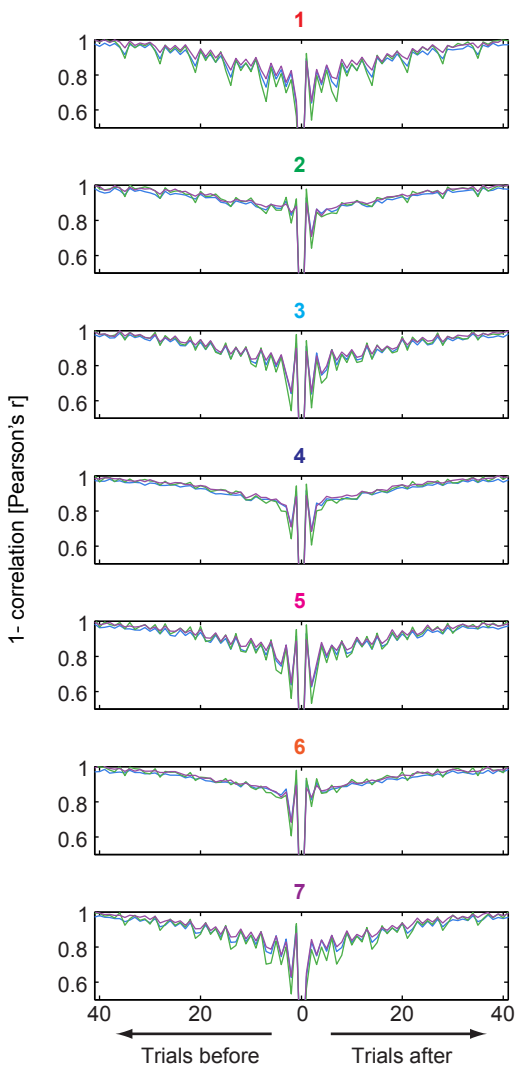

Supplementary Figure2  
Henriksson et al.
